# Supplementary material
Source: PubMed Central journal article supplement (PMC6726911)
Supplement: EMBR-20-e45907-s001.pdf [file EMBR-20-e45907-s001.pdf]

## Table of Contents

|                   |    |
|-------------------|----|
| Appendix FigureS1 | 2  |
| Appendix FigureS2 | 3  |
| Appendix FigureS3 | 5  |
| Appendix FigureS4 | 6  |
| Appendix FigureS5 | 7  |
| Appendix FigureS6 | 8  |
| Appendix FigureS7 | 9  |
| Appendix FigureS8 | 10 |
| Appendix FigureS9 | 11 |
| Appendix Table S1 |    |
| Appendix Table S2 |    |

# Appendix Fig S1

**A**

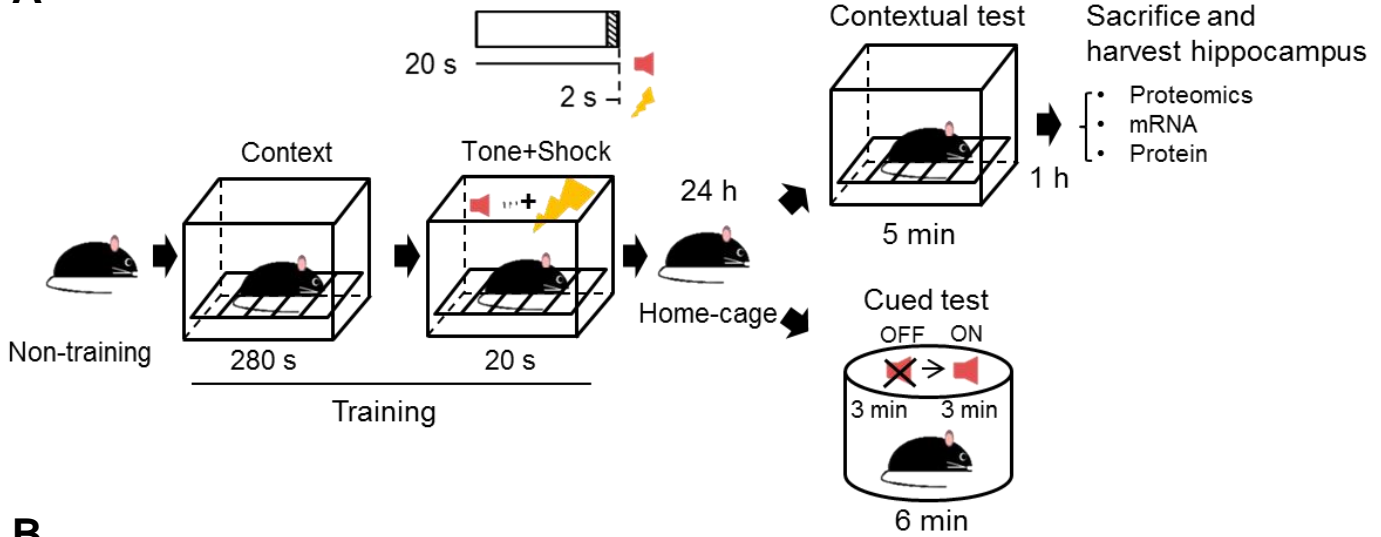

**B**

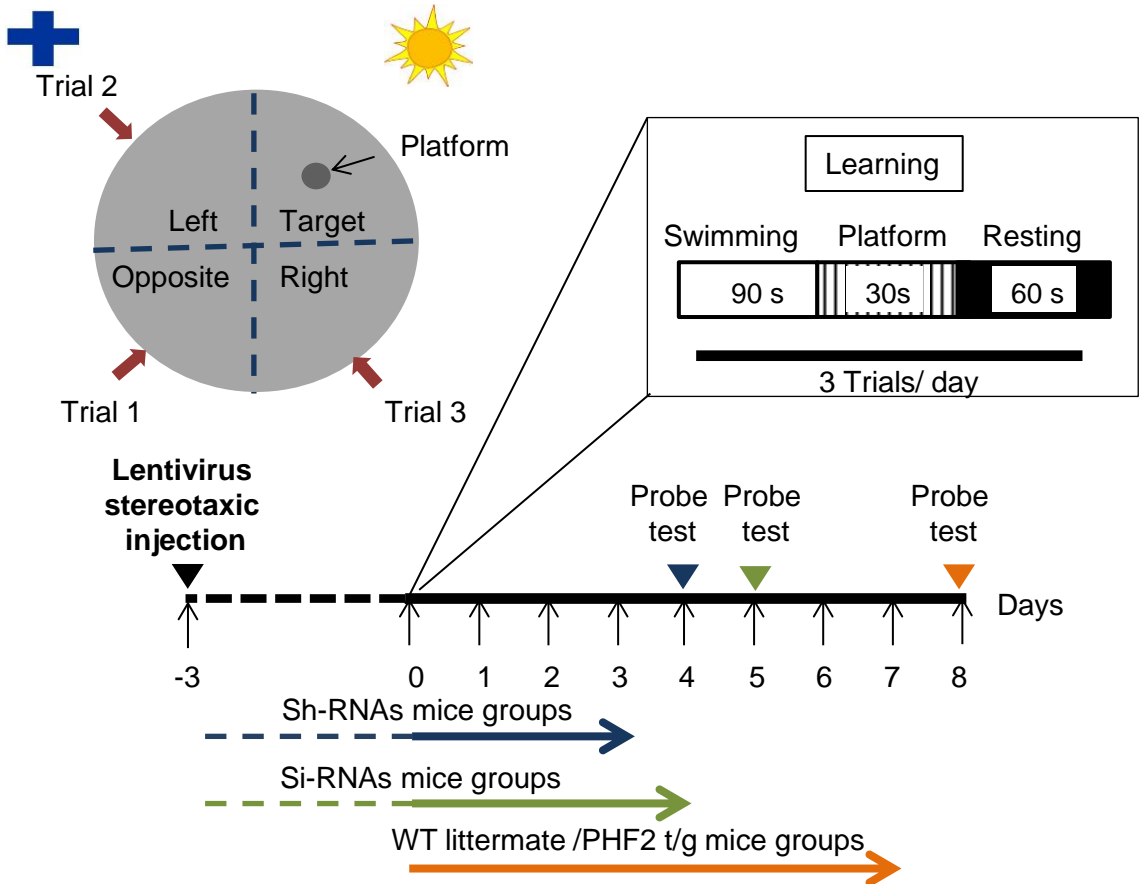

**Appendix Fig S1. Behavioral diagrams**

(A) Diagram of the apparatus used for contextual fear conditioning test. Mice were trained for the contextual fear conditioning (a tone shock, 80 db, 2 kHz, 20 s; a foot shock, 2 s, 0.7 mA/sec constant current) and tested 24 h later. (B) Diagram of the apparatus used for Morris water maze test.

# Appendix Fig S2

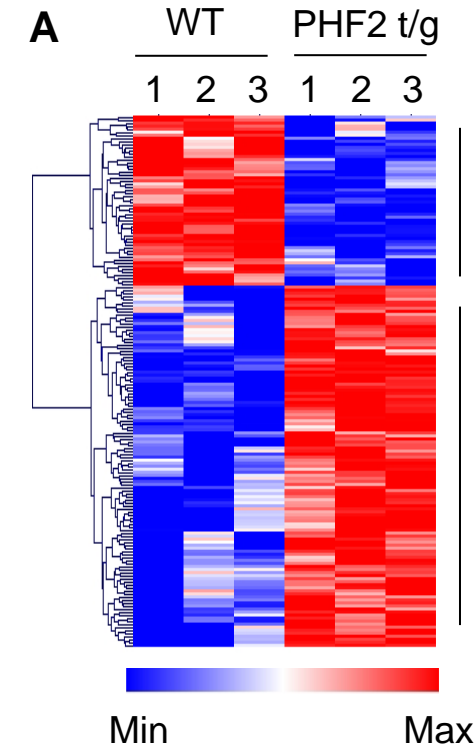

**C**

Up regulation

| Category                                                  | Gene | P value |
|-----------------------------------------------------------|------|---------|
| collagen fibril organization                              | 4    | 0.002   |
| signal transduction                                       | 17   | 0.006   |
| positive regulation of cell proliferation                 | 9    | 0.023   |
| eating behavior                                           | 3    | 0.025   |
| maternal aggressive behavior                              | 2    | 0.025   |
| cell-cell signaling                                       | 4    | 0.029   |
| negative regulation of cell adhesion mediated by integrin | 2    | 0.032   |
| proteolysis                                               | 9    | 0.034   |
| negative regulation of BMP signaling pathway              | 3    | 0.035   |
| osteoblast differentiation                                | 4    | 0.036   |

Down regulation

| Category                                     | Gene | adjP  |
|----------------------------------------------|------|-------|
| cellular response to interferon-gamma        | 5    | 0.001 |
| lymphocyte chemotaxis                        | 4    | 0.001 |
| monocyte chemotaxis                          | 4    | 0.001 |
| chemokine-mediated signaling pathway         | 4    | 0.001 |
| neutrophil chemotaxis                        | 4    | 0.001 |
| activation of GTPase activity                | 4    | 0.001 |
| cellular response to interleukin-1           | 4    | 0.001 |
| positive regulation of ERK1 and ERK2 cascade | 4    | 0.001 |
| T cell costimulation                         | 5    | 0.001 |
| cellular response to tumor necrosis factor   | 4    | 0.003 |

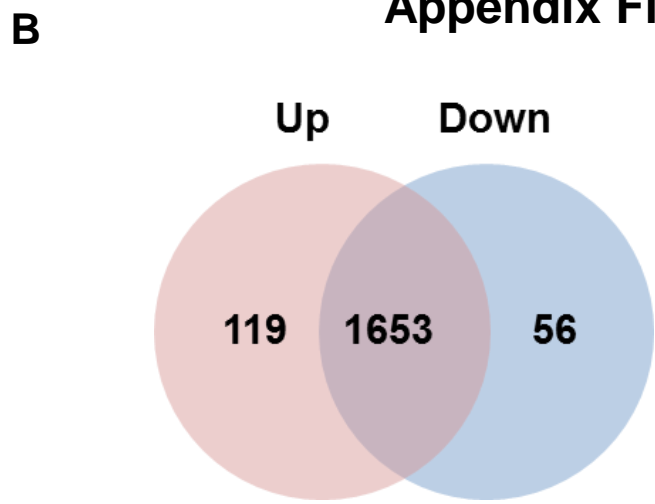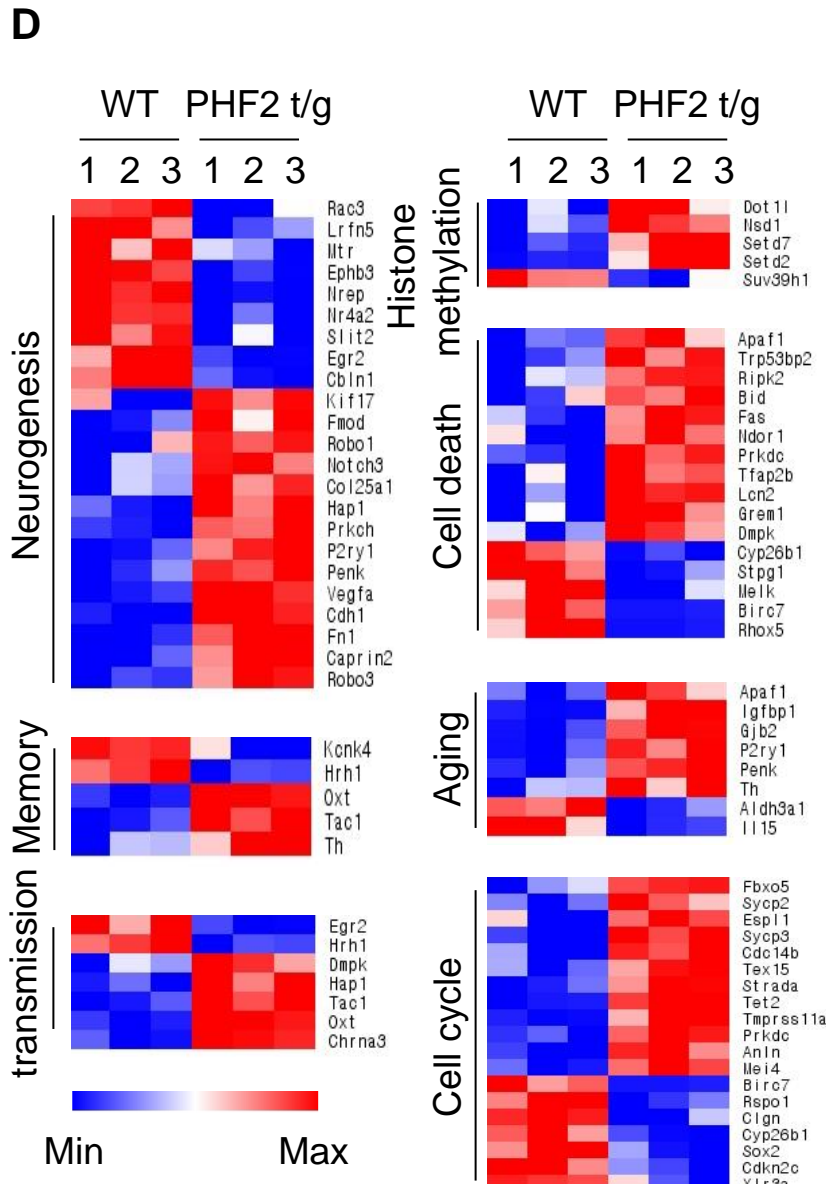

**Appendix Fig S2. QuantSeq analysis in the hippocampus of WT and PHF2 t/g.** (A) Heat map depicts the changes in gene expression between WT and PHF2 t/g hippocampal tissue. (B) Venn diagrams show the number of genes that were upregulated or down regulated between WT and PHF2 t/g. (C) KEGG analysis of genes up-regulated or down-regulated in WT and PHF2 t/g mice. (D) Heat map of 7 groups of genes from the KEGG analysis in panel A. P values were calculated using a hypergeometric test (raw P value) and adjusted by multiple testing (adjusted P values).

## Appendix Fig S3

**A**

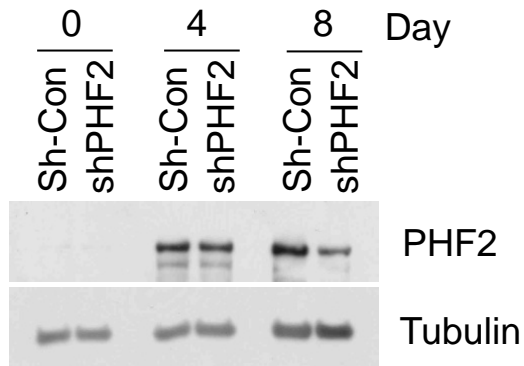

**B**

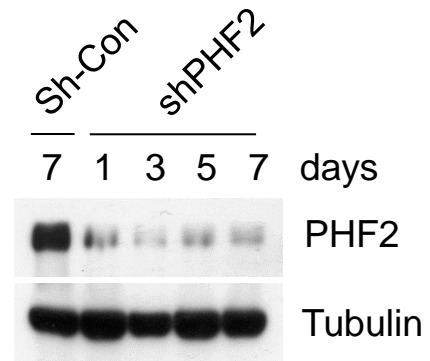

**C**

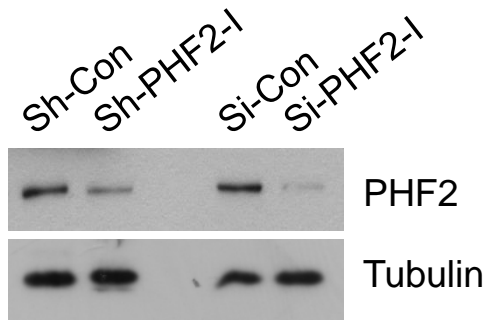

**Appendix Fig S3. Reduced expression of PHF2 by sh-PHF2 or si-PHF2.** (A) Time-dependent knocked-down expression of PHF2 by transfection of sh-PHF2 lentivirus into primary neurons. (B) Knocked-down expression of PHF2 in hippocampus at the indicated time after stereotactic injection of sh-PHF2 lentivirus into CA1 region. (C) Knocked-down expression of PHF2 in hippocampus on the third day after stereotactic injection of shRNA or siRNA into CA1 region.

## Appendix Fig S4

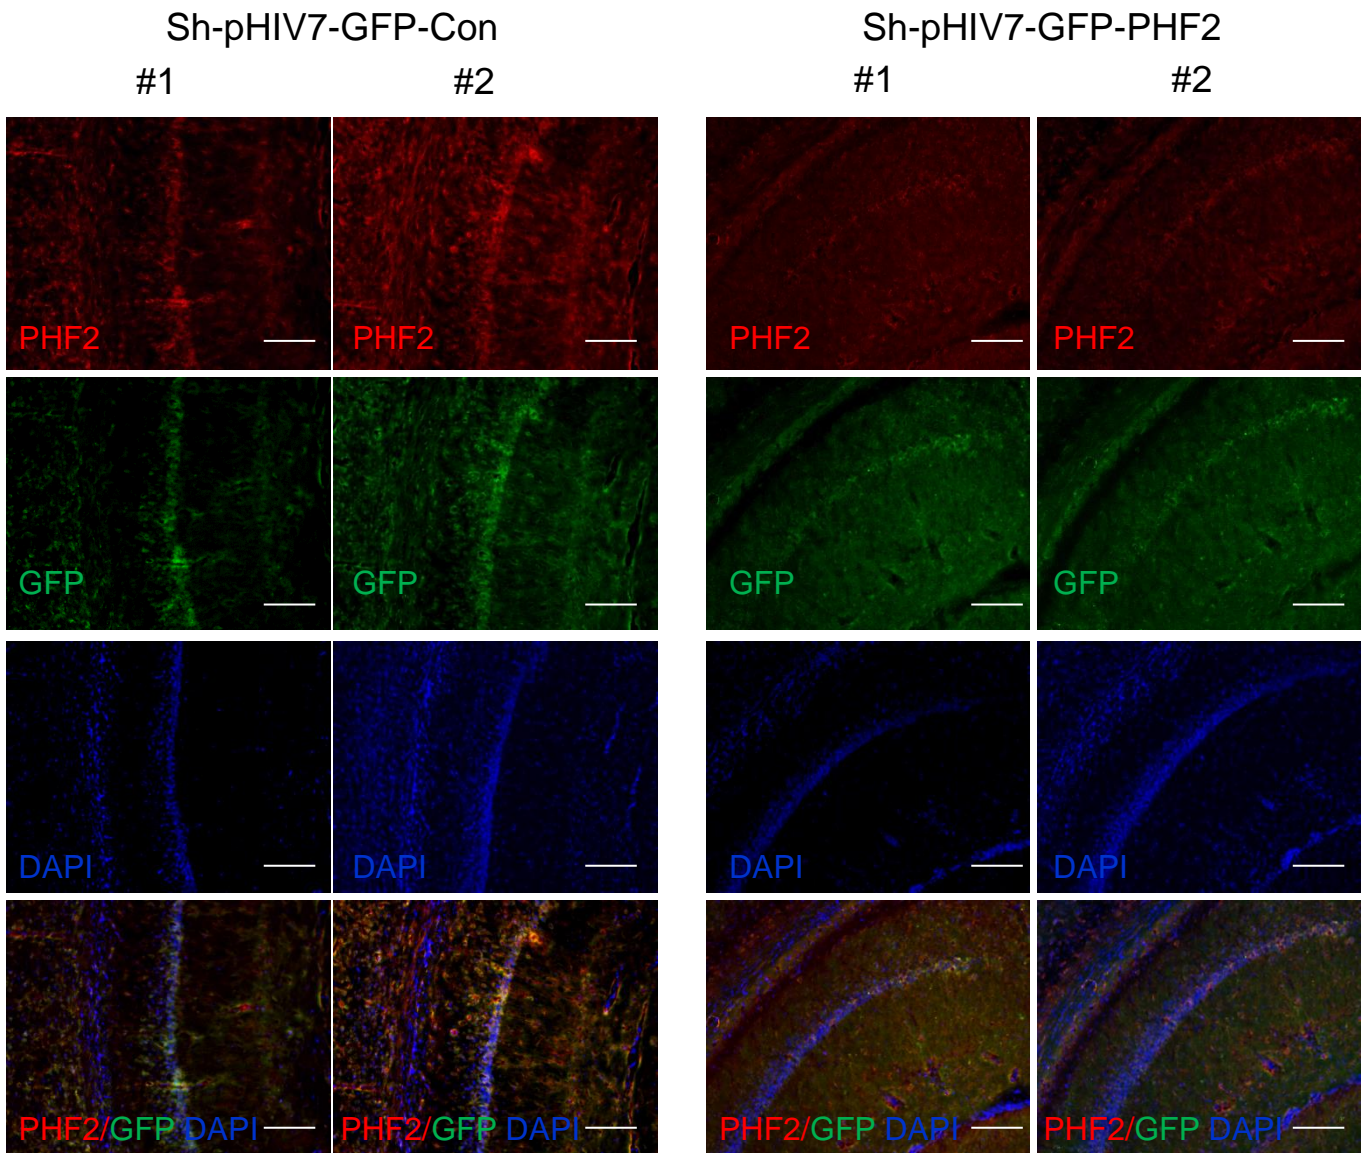

**Appendix Fig S4. Immunofluorescence analysis of the PHF2 levels in the hippocampus.** Immunofluorescence staining of indicated proteins after stereotaxic injection of the indicated lentiviral particles into bilateral hippocampus CA1 of WT mice. Scale bar, 100  $\mu$ m.

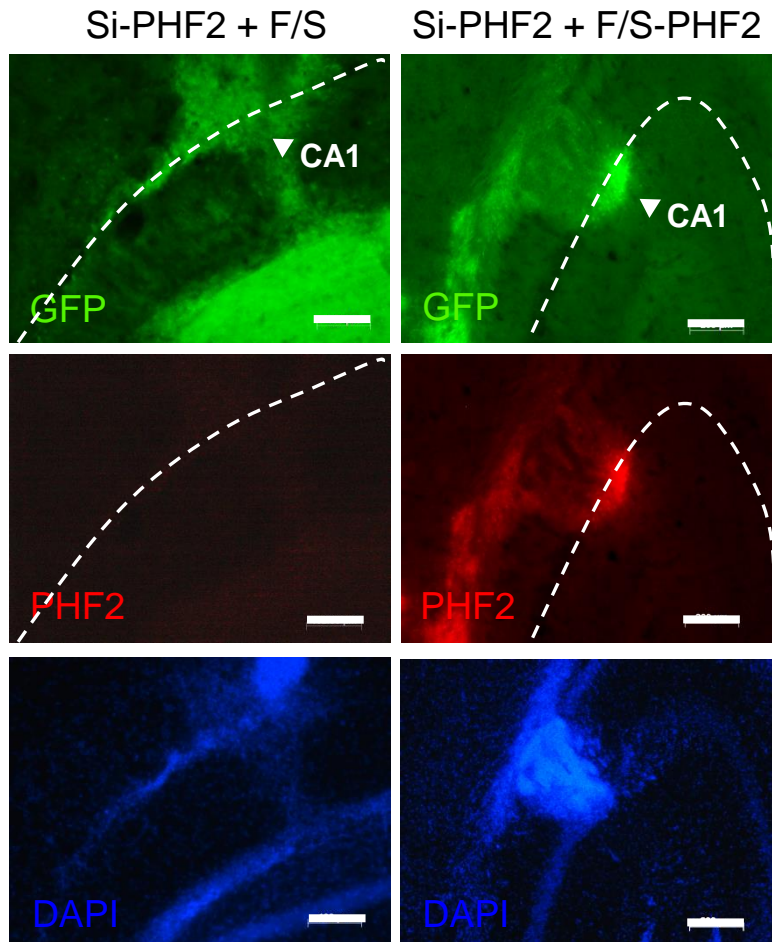

**Appendix Fig S5. Immunofluorescence analysis of PHF2 protein in the hippocampus.** Stereotaxic injection of Si-PHF2 and F/S or F/S-PHF2 into bilateral hippocampus CA1 of WT mice. Scale bar, 100  $\mu$ m.

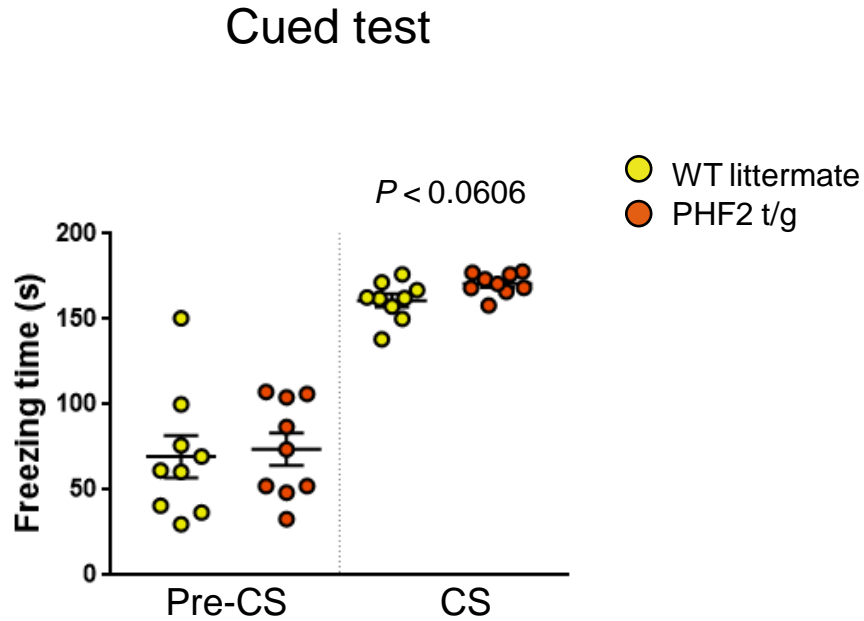

**Appendix Fig S6. Cued dependent memory formation in WT or PHF2 t/g mice.** The training consisted of a 280 s exposure of mice to the conditioning box (context) followed by a tone (80 db, 2 kHz, 20 s). And a foot shock (0.7 mA/sec constant current) was administered during the last 2 s of tone presentation and co-terminated with the tone. Approximately 24 hours after training, each mice were re-exposed to a novel context for 3 min followed by an additional 3-min exposure to a tone. Freezing was recorded every 1min for 6 min.

Data format: Data are represented as the mean values  $\pm$  SEM (n = 9). Data were analyzed using unpaired, two-sided Student's t-test.

## Appendix Fig S7

**A**

| Transcription factors |           |       |
|-----------------------|-----------|-------|
| Up                    | Activator | CREB  |
|                       |           | TCF4  |
|                       |           | GTF2I |
|                       |           | STAT6 |
|                       |           | JUNB  |
|                       |           | PBX3  |
|                       | Inhibitor | MEF2A |
|                       |           | STAT1 |
| Down                  | Activator | MEF2D |
|                       |           | ATF2  |
|                       |           | JUND  |
|                       | Inhibitor | STAT3 |

**B**

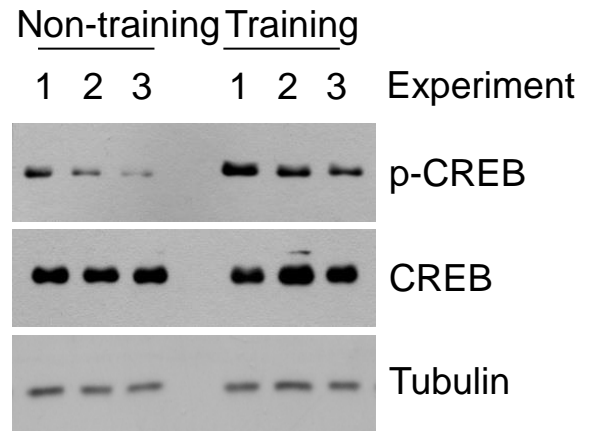

**Appendix Fig S7. Post-training induces activation of CREB in hippocampus.** (A) The table represents selection of transcription factors differentially upregulated or downregulated in hippocampal lysate from CFC trained mice. (B) Immunoblotting assay of phosphorylated CREB and total CREB. Trained mice showed increase in p-CREB levels.

**A**

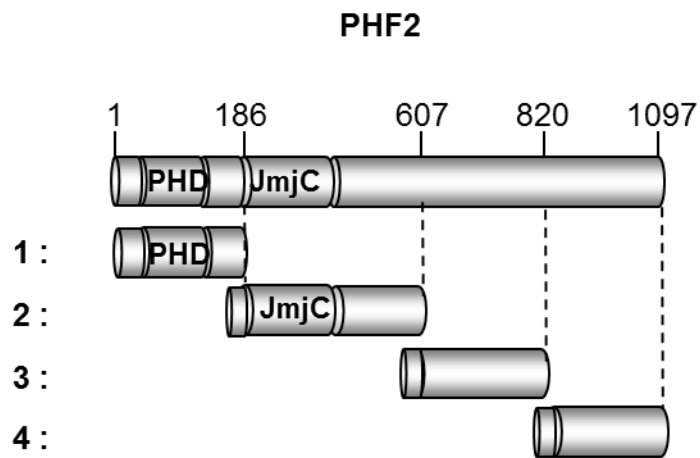

**B**

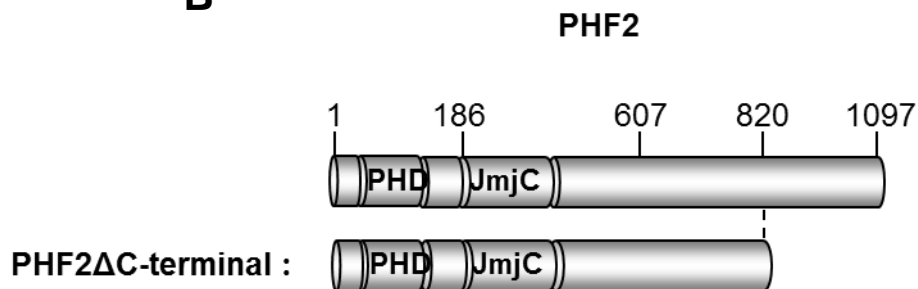

**Appendix Fig S8. Schematic representation of PHF2 domain structure.** (A) The domain structure of F/S-tagged PHF2 fragments. (B) The deletion mutant of PHF2 C-terminal region (PHF2ΔC).

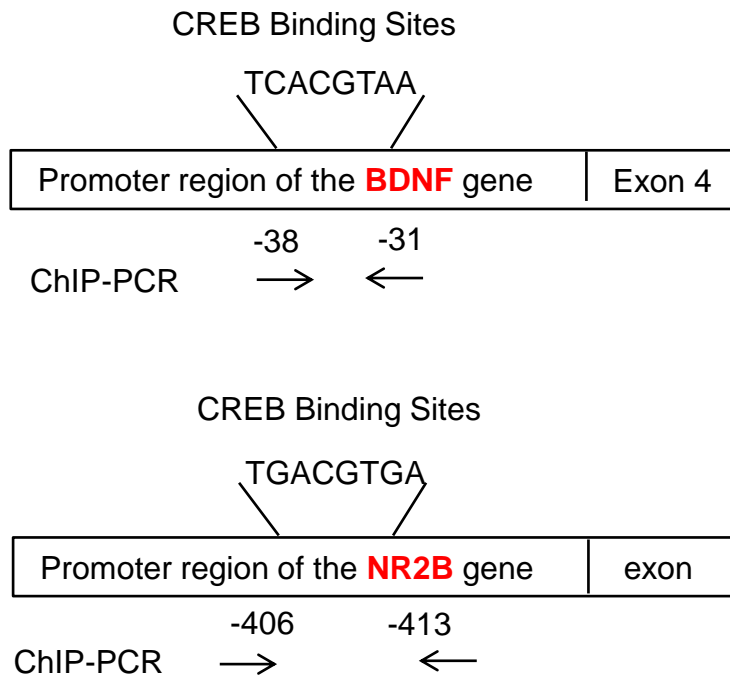

**Appendix Fig S9. CRE sequence of the BDNF and NR2B promoter.**

**Appendix Table S1. Nucleotide sequences of siRNAs and shRNAs used in knock- down experiments.**

| Purposes | Targets        | Sequences (5' to 3')                                             |
|----------|----------------|------------------------------------------------------------------|
| shRNAs   | Control        | CUAGCAAAAACGCUGAGUACUUCGAAAUGUCCUCGAGGACAUUUC<br>GAAGUACUCAGCGCC |
|          | <i>Phf2-I</i>  | CUAGCAAAAACGUGGCUAUUAAAGUGUUCUACUCGAGUAGAACAC<br>UUUAAUAGCCACGCC |
|          | <i>Phf2-II</i> | GGCCGGCGTGGCUAUUAAGUGUUCUACUCGA GUAGAACACUUU<br>AAUAGCCACGUUUUUG |
| siRNA    | Non-target     | UUGAGCAAUUCACGUUCAUUU                                            |
|          | <i>Phf2-I</i>  | CACUUCUUCCCUUUCUUCUUGCUCCCA                                      |

**Appendix Table S2. Primers used in real-time PCR and ChIP assays.**

|                 | <b>Gene</b>                      | <b>Forward primers (5' to 3')</b> | <b>Reverse primers (5' to 3')</b>                                    |
|-----------------|----------------------------------|-----------------------------------|----------------------------------------------------------------------|
| <b>RT-qPCR</b>  | <i>Bdnf</i>                      | ATGCCGCAAACATGTCTATGAG            | TGACCCACTCGCTAATACTGTCA                                              |
|                 | <i>CamKII<math>\alpha</math></i> | ACCCTGGCCTGGTCCTTCAATG            | AGCCATCCTCACCCTATGCTGG                                               |
|                 | <i>Cdk5</i>                      | GGCTAAAAACCGGGAAACTC              | CCATTGCAGCTGTCGAAATA                                                 |
|                 | <i>Creb</i>                      | TCAGGGTACTACCATTC                 | TTCAGCAGGCTGTGTAGGAA                                                 |
|                 | <i>C-fos</i>                     | TTCCTGGCAATAGCGTGTTT              | TTCAGACCACCTCGACAATG                                                 |
|                 | <i>Egr1</i>                      | CGAGCGAACAACCCTATGAG              | CATTATTCAGAGCGATGTCAGAAA                                             |
|                 | <i>Glur1</i>                     | TTTTCTAGGTGCGGTTGTGG              | CCT TTGGAGAACTGGGAACA                                                |
|                 | <i>Glur2</i>                     | AAGGAGGAAAGGGAAACGAG              | CCGAAGTGGAAGAACTGAACC                                                |
|                 | <i>Npas4</i>                     | GCTATACTCAGAAGGTCCAGAAGGC         | TCAGAGAATGAGGGTAGCACAGC                                              |
|                 | <i>Nr2b</i>                      | TCTGCCTTCTTAGAGCCATTAG            | AGACAGCTACAGCAGAGAC                                                  |
|                 | <i>Psd95</i>                     | ATTCCCAGCAAACGGCG                 | ACTGAACCTGACCGTACAGGCCTTTA<br>ACCTTGACCACTCTCCCTTTGGAGAC<br>TGGGAACA |
|                 | <i>Phf2</i>                      | TGCCCCGAAGTGCAGAGAAAACCC          | TTTCACGTCCGGTGTGGCCC                                                 |
|                 | <i>Shank3</i>                    | CTGCACATCTGTGCCCTCTA              | AAGCTCAAAGTTCCCTGCAA                                                 |
|                 | <i>Trkb</i>                      | GTGGTGTCTATTAGTAGGTTCTTTGTT<br>TT | ACTGAACCTGACCGTACAGAGTT<br>TGGGTCTTTGCTGCC                           |
| <b>ChIP PCR</b> | <i>Bdnf</i>                      | TGATCATCACTCACGACCACG             | CAGCCTCTCTGAGCCAGTTACG                                               |
|                 | <i>Nr2b</i>                      | CGCTGCTATTCTTCTTGCT               | CCCTCACTCCCACTGCTAAG                                                 |
|                 | <i>Gapdh</i>                     | CCTGCTTATCCAGTCCTAGCTA            | AAATGAGGCGGGTCCAAAG                                                  |
