# Supplementary material
Source: PubMed Central journal article supplement (PMC6726911)

Fig. 1A

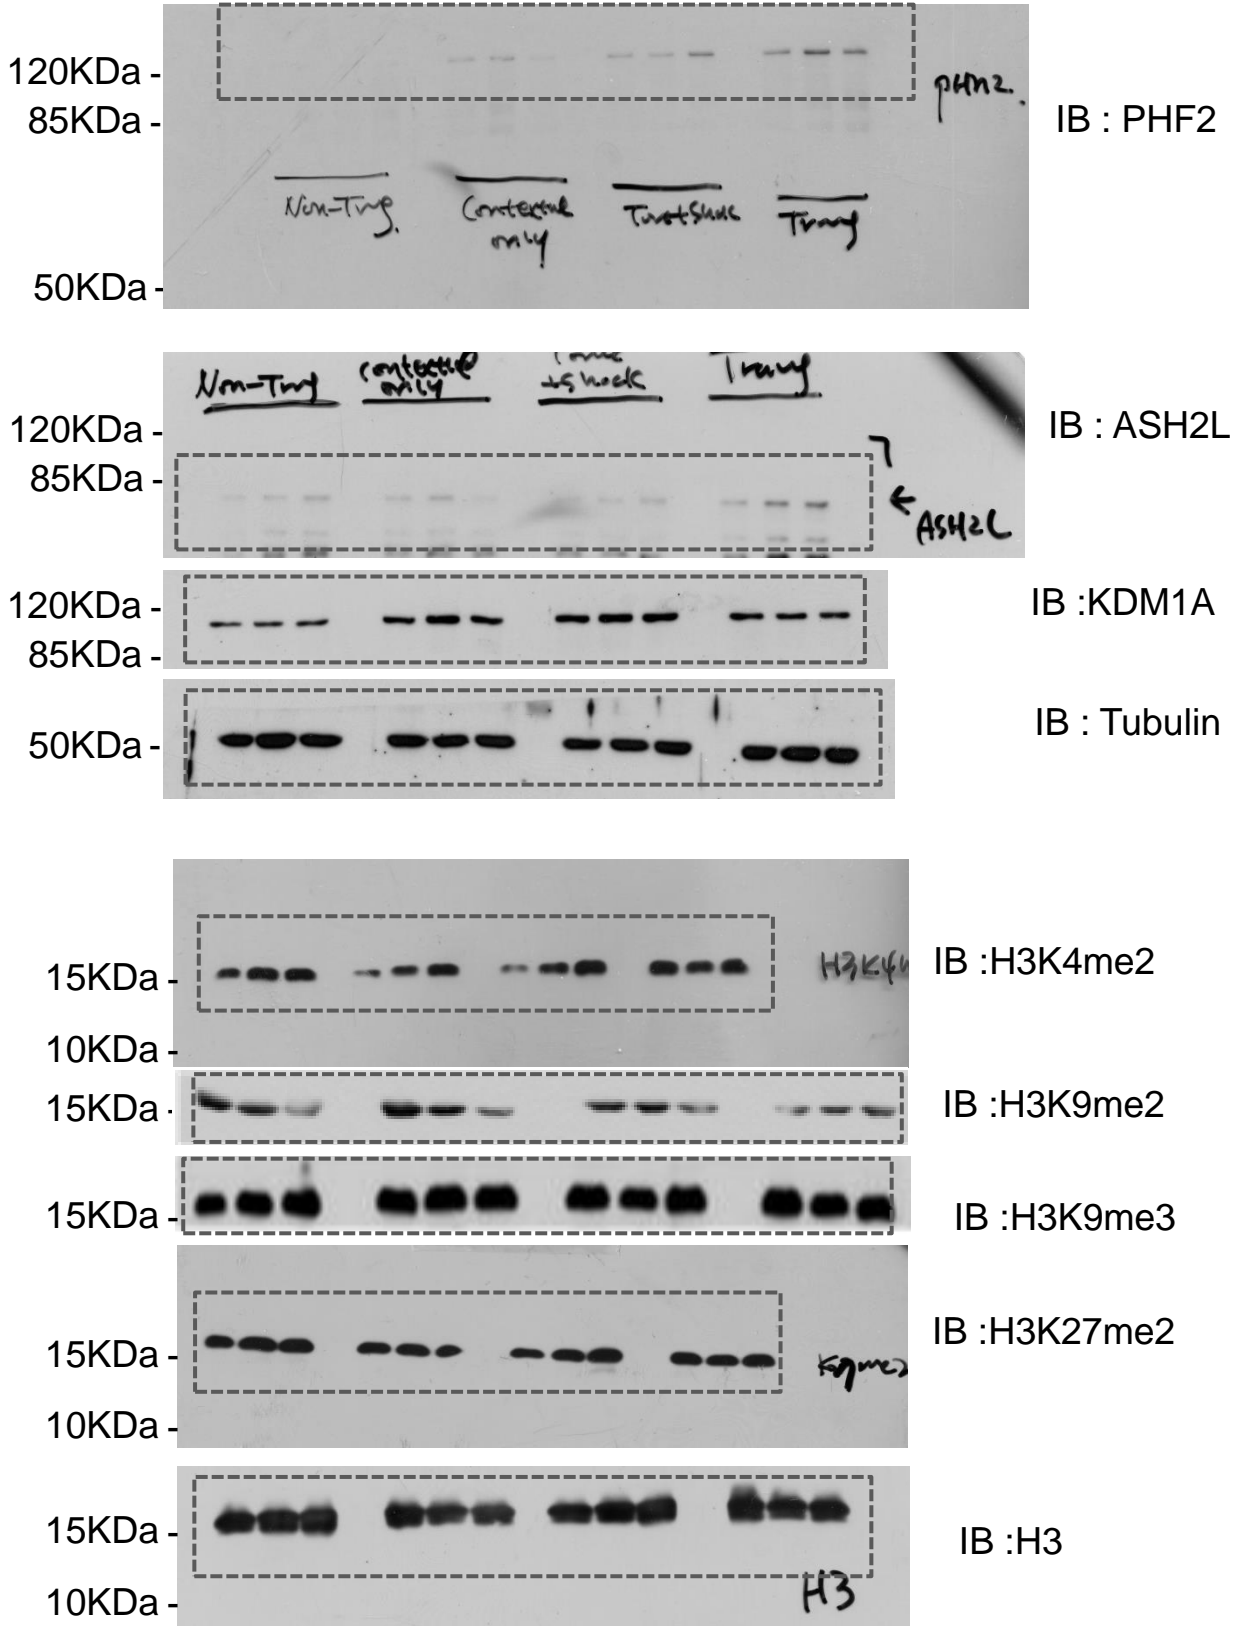

Supplement: EMBR-20-e45907-s006.pdf [file EMBR-20-e45907-s006.pdf]

Fig. 2A

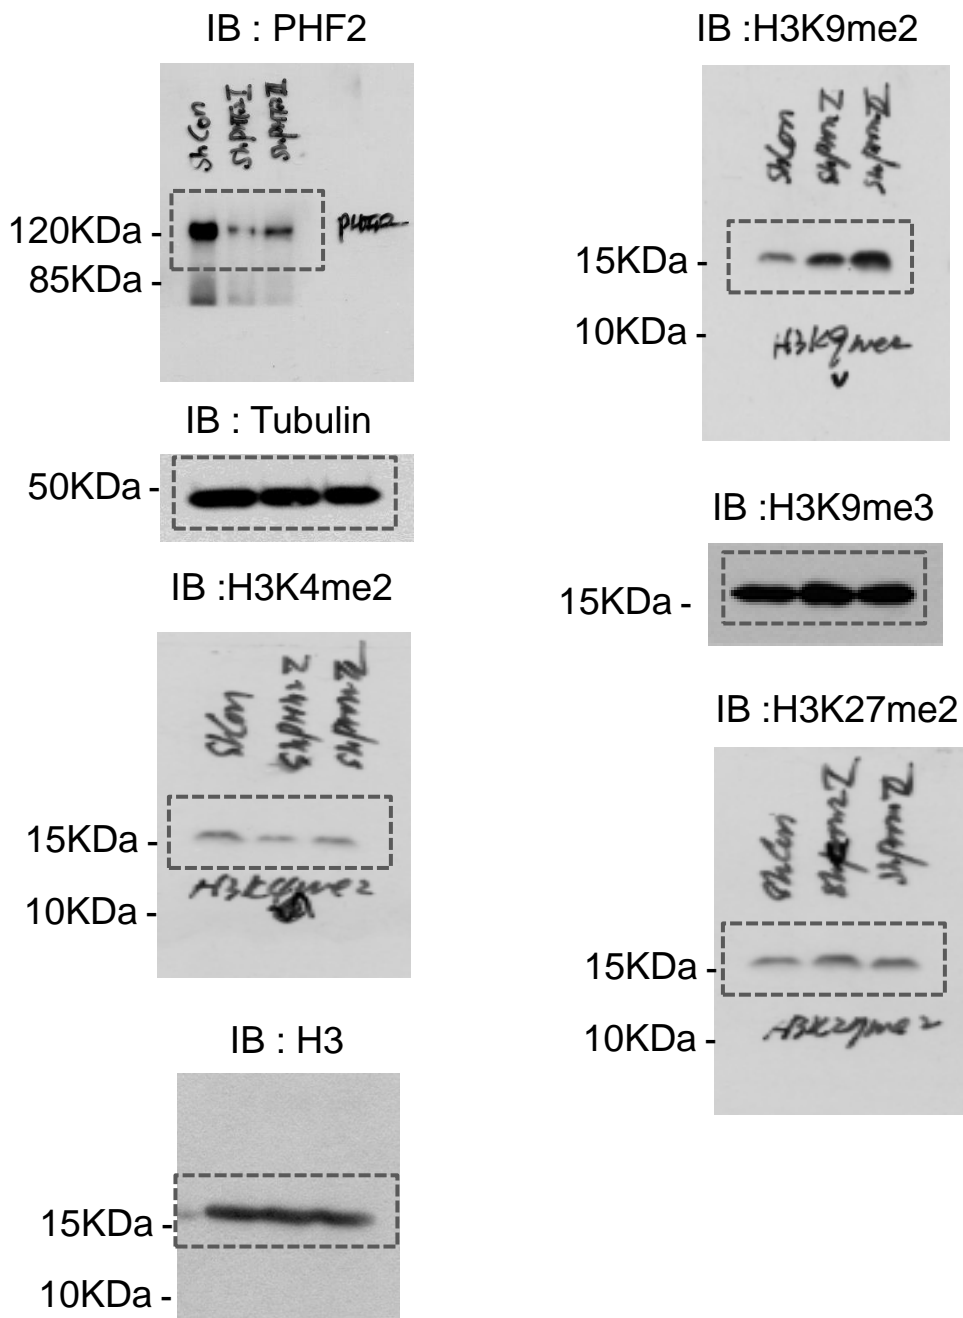

Supplement: EMBR-20-e45907-s007.pdf [file EMBR-20-e45907-s007.pdf]

**Fig. 3A**

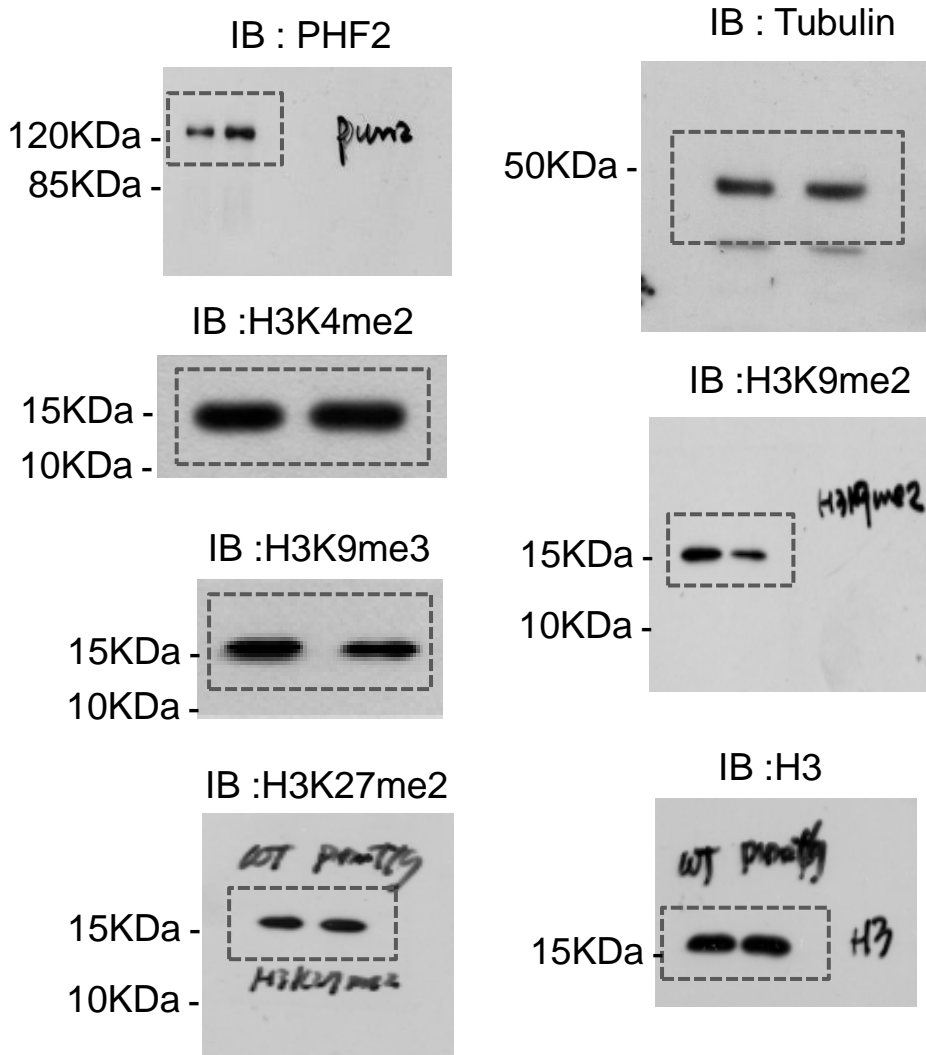

Supplement: EMBR-20-e45907-s008.pdf [file EMBR-20-e45907-s008.pdf]

**Fig. 5A**

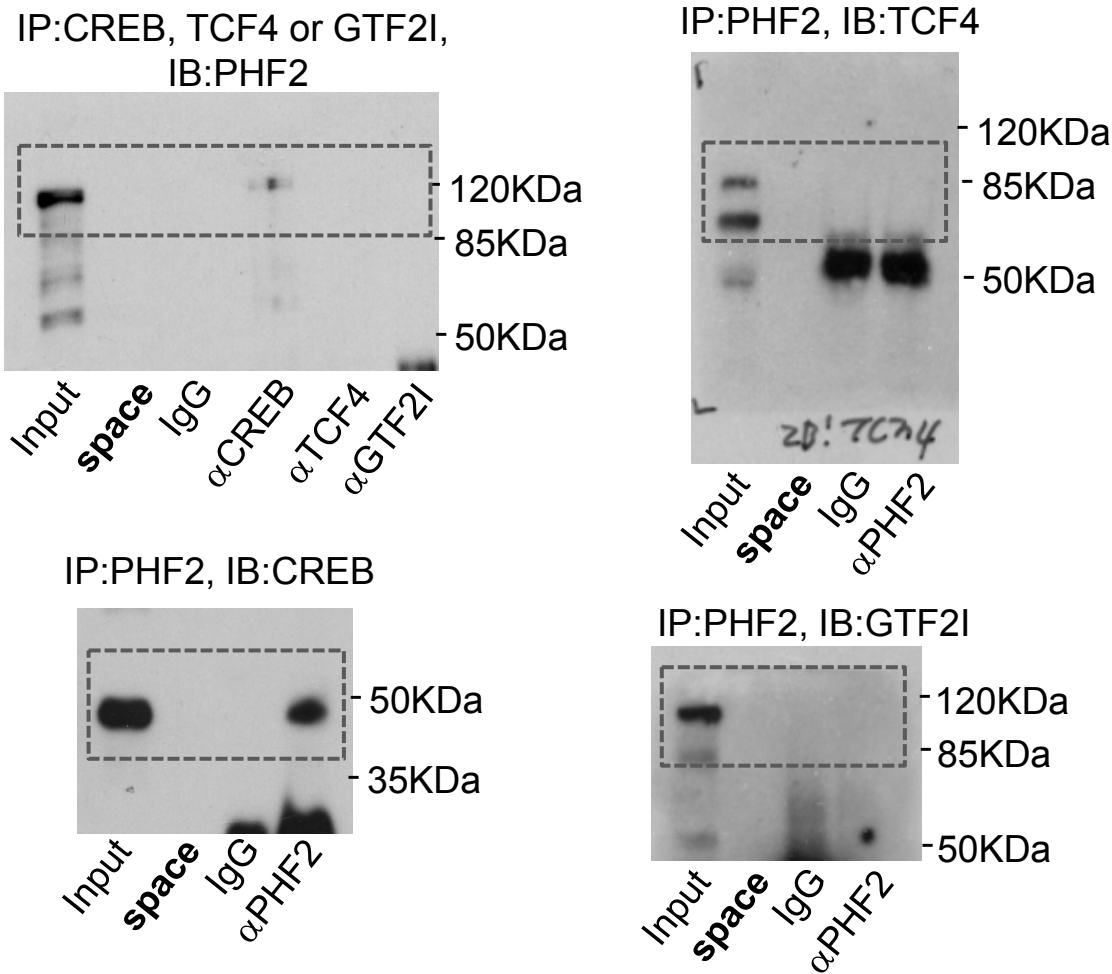

**Fig 5B**

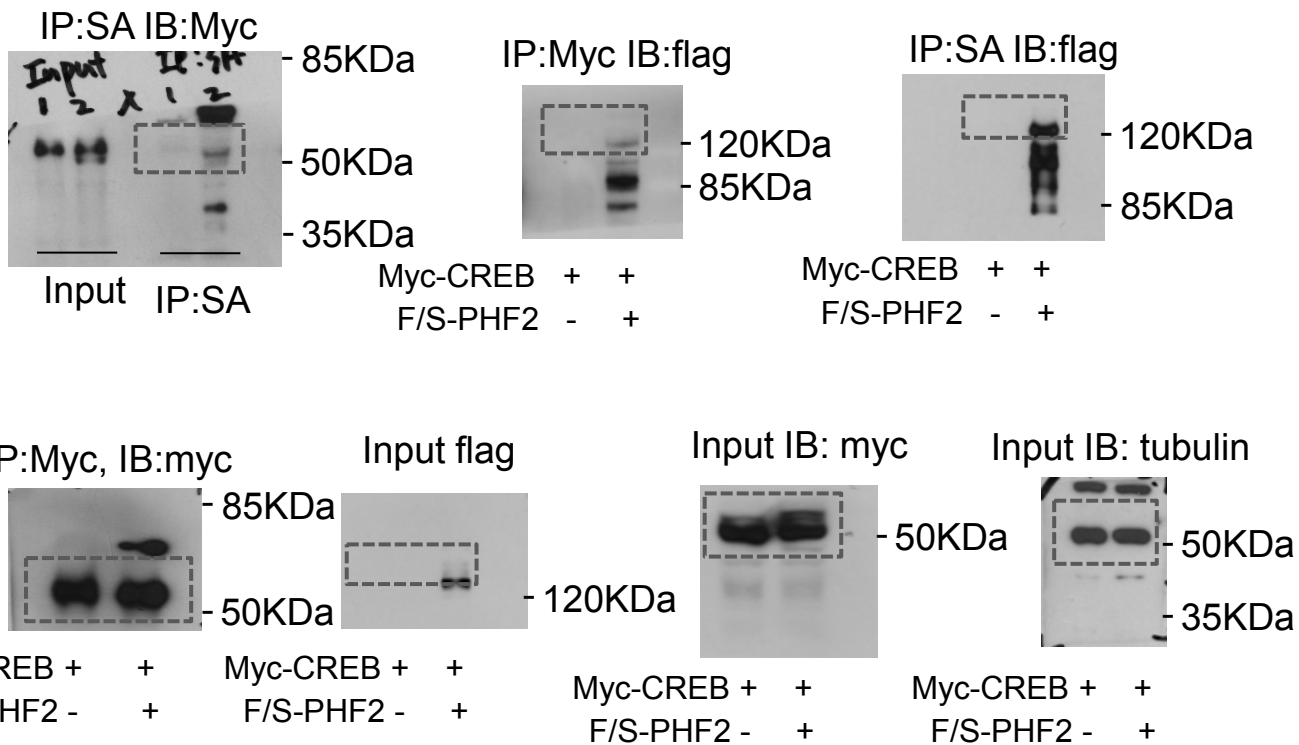

**Fig 5C**

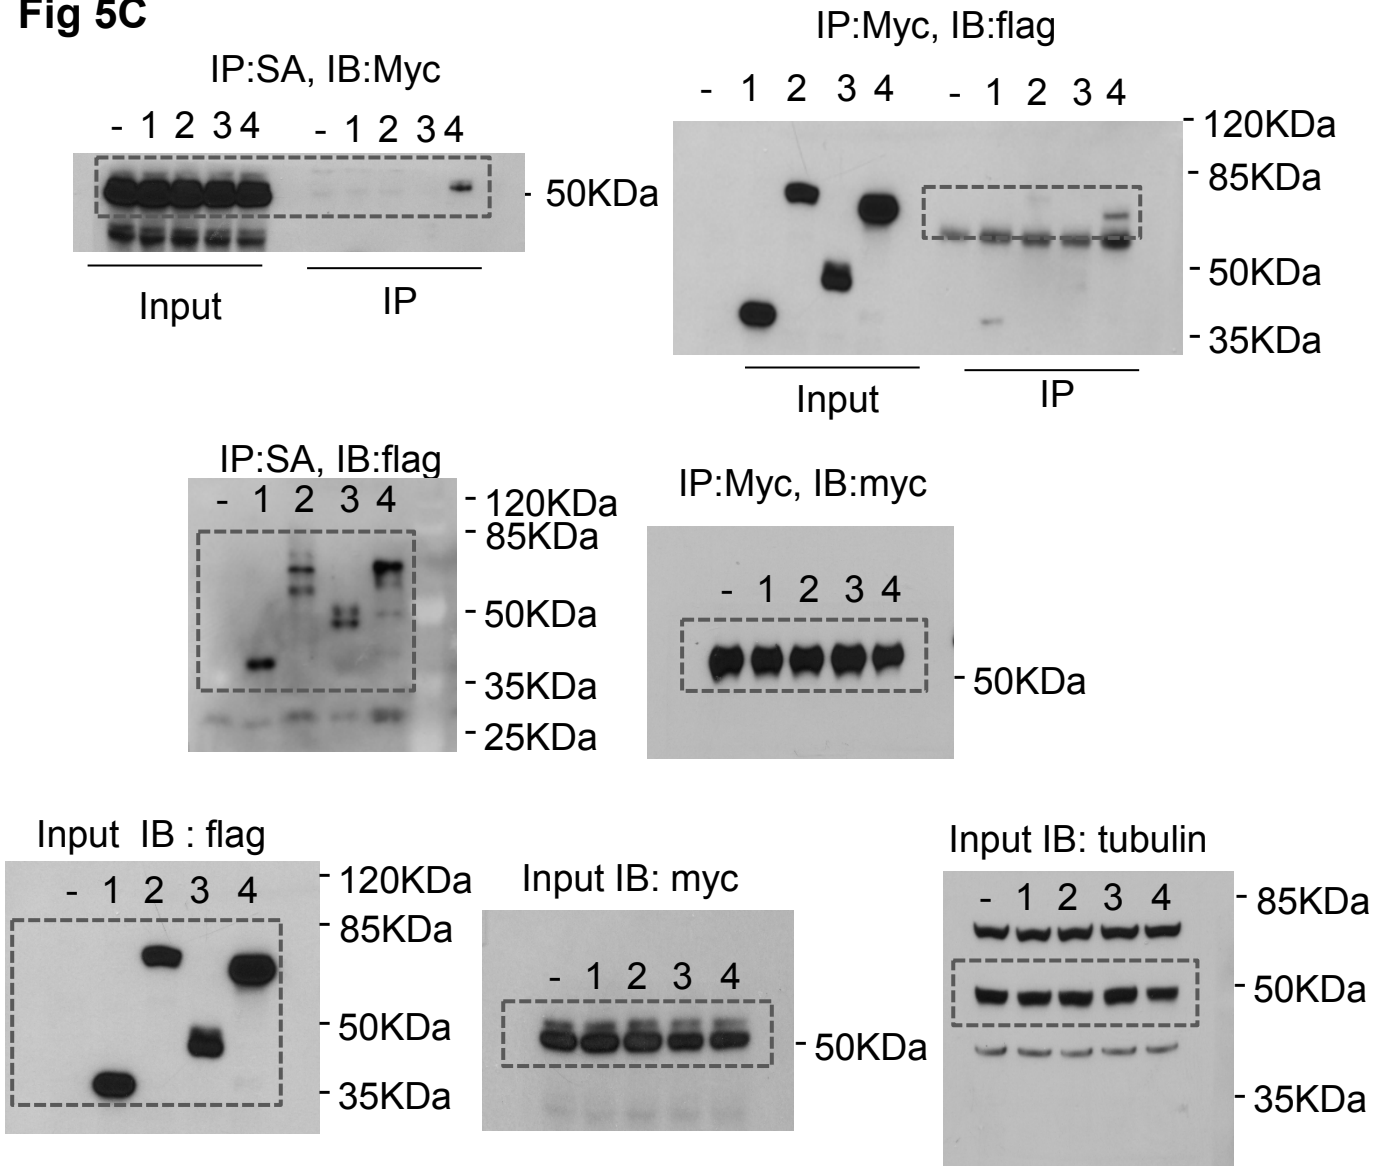

**Fig. 5J**

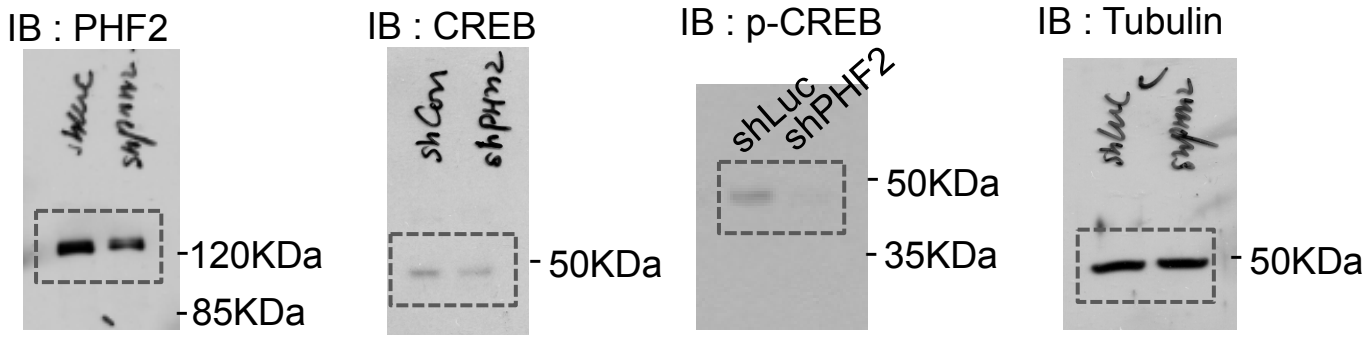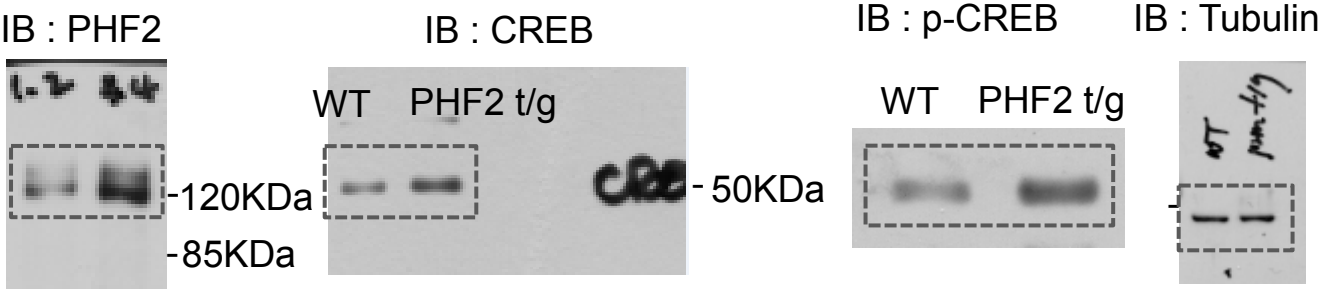

**Fig. 5K**

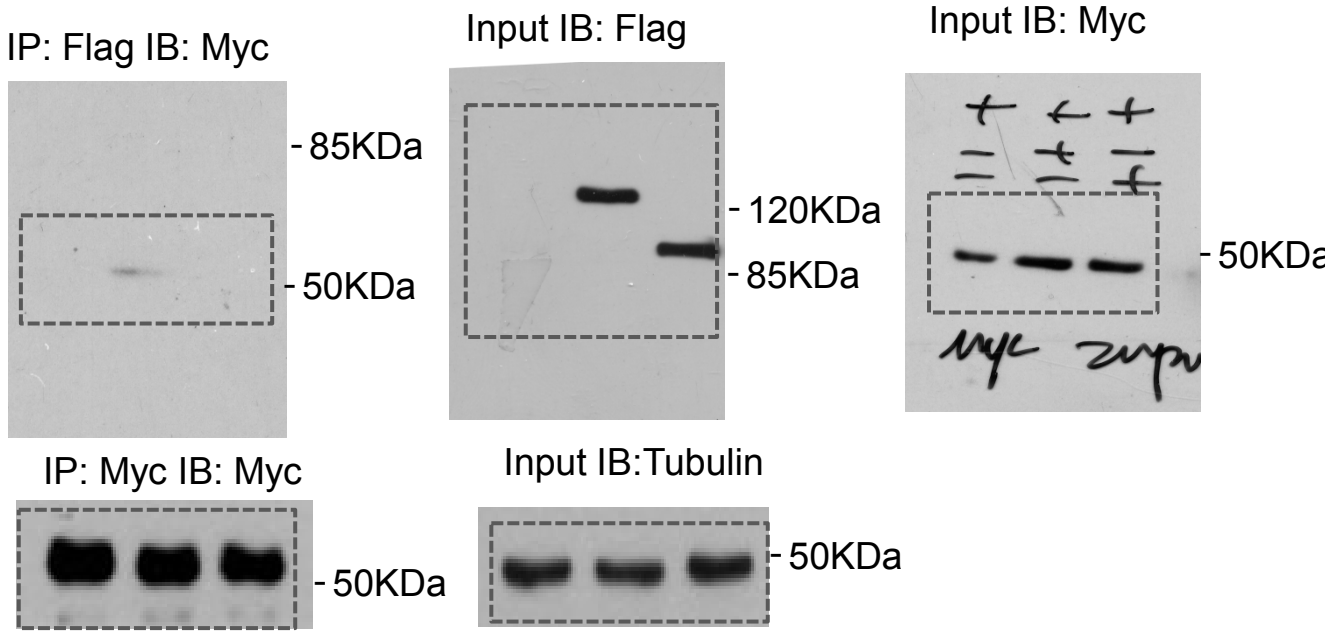

Supplement: EMBR-20-e45907-s009.pdf [file EMBR-20-e45907-s009.pdf]

Fig. 6A

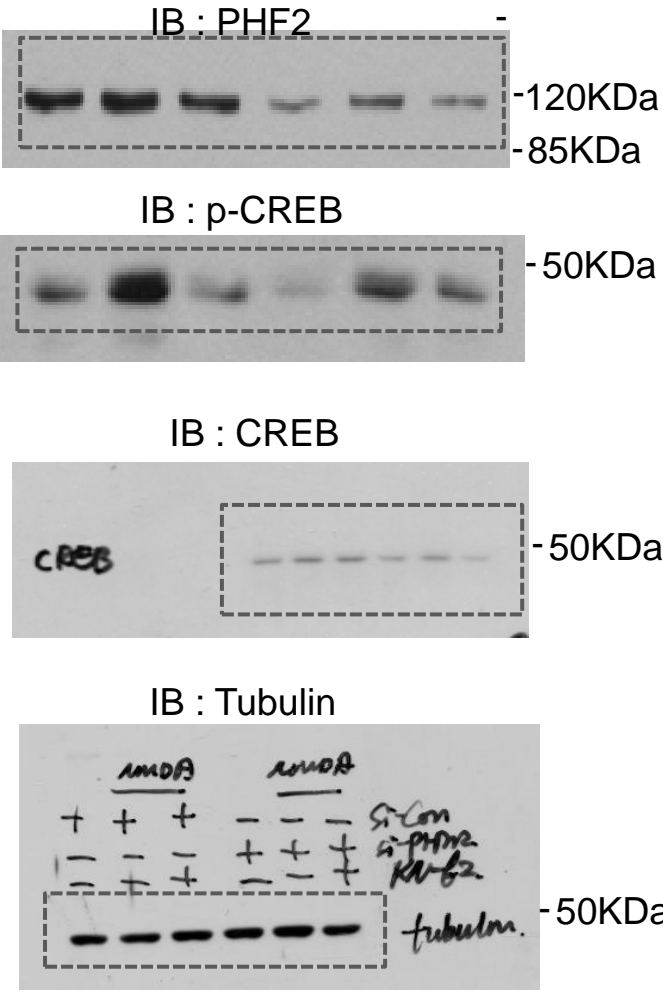

Supplement: EMBR-20-e45907-s010.pdf [file EMBR-20-e45907-s010.pdf]
